# Supplementary material for: Rapid Turnover of Long Noncoding RNAs and the Evolution of Gene Expression
Source: PLoS Genet. 2012 Jul 26;8(7):e1002841. doi: 10.1371/journal.pgen.1002841 (PMC3406015; doi:10.1371/journal.pgen.1002841)
Supplement: Table S13 — Effect of intergenic lncRNA transcription on protein-coding gene B. (XLS) [file pgen.1002841.s027.xls]

## Sheet: supplementary_table_S13
Protein coding gene B	type	species	expression
			mouse	rat	fold difference
ENSMUSG00000019996	rodent conserved	mouse	20.8049	11.5721	0.443781
ENSMUSG00000005871	rodent conserved	mouse	14.6511	23.3311	-0.592445
ENSMUSG00000056536	rodent conserved	mouse	0.376867	33.7981	-88.6819
ENSMUSG00000010044	rodent conserved	mouse	0.0629185	0.116489	-0.851424
ENSMUSG00000030641	rodent conserved	mouse	0.362688	0.241498	0.334144
ENSMUSG00000056598	rodent conserved	mouse	0.513591	0.999274	-0.945663
ENSMUSG00000015143	rodent conserved	mouse	24.4692	16.7235	0.316549
ENSMUSG00000078572	rodent conserved	mouse	33.2682	25.6257	0.229722
ENSMUSG00000032036	rodent conserved	mouse	0.241096	0.0613492	0.745541
ENSMUSG00000024440	rodent conserved	mouse	6.08734	3.79701	0.376244
ENSMUSG00000041040	rodent conserved	mouse	0.8494	11.4988	-12.5376
ENSMUSG00000070509	rodent conserved	mouse	0.501918	0.193725	0.614031
ENSMUSG00000012443	rodent conserved	mouse	0.435364	1.59427	-2.66192
ENSMUSG00000028082	rodent conserved	mouse	19.8576	18.6413	0.0612491
ENSMUSG00000056162	rodent conserved	mouse	0.550047	2.30621	-3.19275
ENSMUSG00000022808	rodent conserved	mouse	23.7943	18.073	0.240448
ENSMUSG00000054150	rodent conserved	mouse	2.76886	1.88708	0.318463
ENSMUSG00000048915	rodent conserved	mouse	1.37384	29.7299	-20.64
ENSMUSG00000030340	rodent conserved	mouse	5.21604	0.77903	0.850647
ENSMUSG00000006281	rodent conserved	mouse	7.53	5.79486	0.23043
ENSMUSG00000048100	rodent conserved	mouse	3.77511	12.3686	-2.27635
ENSMUSG00000005370	rodent conserved	mouse	8.10598	8.65601	-0.0678544
ENSMUSG00000070953	rodent conserved	mouse	13.1951	10.7555	0.184887
ENSMUSG00000024818	rodent conserved	mouse	57.0312	1.40355	0.97539
ENSMUSG00000029004	rodent conserved	mouse	7.99533	26.0623	-2.25969
ENSMUSG00000045795	rodent conserved	mouse	20.5459	10.9779	0.465688
ENSMUSG00000026918	rodent conserved	mouse	16.4217	15.5583	0.0525787
ENSMUSG00000042729	rodent conserved	mouse	39.7884	18.4376	0.536608
ENSMUSG00000030513	rodent conserved	mouse	52.965	17.1389	0.676411
ENSMUSG00000053559	rodent conserved	mouse	27.3129	62.7385	-1.29703
ENSMUSG00000020441	rodent conserved	mouse	6.87452	9.50791	-0.383065
ENSMUSG00000021189	rodent conserved	mouse	12.086	15.8973	-0.315347
ENSMUSG00000031833	rodent conserved	mouse	7.90617	4.91718	0.378058
ENSMUSG00000038510	rodent conserved	mouse	4.40481	10.5915	-1.40453
ENSMUSG00000036805	rodent conserved	mouse	0.560874	1.31545	-1.34535
ENSMUSG00000038587	rodent conserved	mouse	2.11632	1.91663	0.0943563
ENSMUSG00000001420	rodent conserved	mouse	1.57662	1.17212	0.256563
ENSMUSG00000020715	rodent conserved	mouse	31.916	11.7512	0.63181
ENSMUSG00000026000	rodent conserved	mouse	46.717	30.26	0.352271
ENSMUSG00000023800	rodent conserved	mouse	6.05645	0.422907	0.930172
ENSMUSG00000070345	rodent conserved	mouse	0.212452	0.582782	-1.74312
ENSMUSG00000021264	rodent conserved	mouse	34.6376	44.3859	-0.281435
ENSMUSG00000033032	rodent conserved	mouse	5.10268	2.56982	0.496379
ENSMUSG00000020029	rodent conserved	rat	78.4796	85.1481	0.0783166
ENSMUSG00000021111	rodent conserved	rat	35.6044	41.2696	0.137273
ENSMUSG00000039634	rodent conserved	rat	4.34732	12.0367	0.638827
ENSMUSG00000073730	rodent conserved	rat	0.239009	4.98987	0.952101
ENSMUSG00000058013	rodent conserved	rat	10.4489	18.971	0.449218
ENSMUSG00000019935	rodent conserved	rat	16.1011	1.19886	-12.4303
ENSMUSG00000060198	rodent conserved	rat	320.347	341.759	0.0626532
ENSMUSG00000037601	rodent conserved	rat	362.867	58.2883	-5.22539
ENSMUSG00000066232	rodent conserved	rat	57.3897	22.237	-1.58082
ENSMUSG00000021364	rodent conserved	rat	233.718	27.4772	-7.5059
ENSMUSG00000024359	rodent conserved	rat	244.256	161.764	-0.509953
ENSMUSG00000026579	rodent conserved	rat	132.046	103.089	-0.280888
ENSMUSG00000031155	rodent conserved	rat	0.685851	4.69654	0.853967
ENSMUSG00000032621	rodent conserved	rat	6.33335	15.3261	0.58676
ENSMUSG00000027782	rodent conserved	rat	37.2429	22.8783	-0.627869
ENSMUSG00000066687	rodent conserved	rat	8.85541	35.7715	0.752445
ENSMUSG00000026715	rodent conserved	rat	2718.4	2377.98	-0.143155
ENSMUSG00000025209	rodent conserved	rat	13.3595	16.7425	0.202056
ENSMUSG00000029480	rodent conserved	rat	4.68795	4.66732	-0.00441847
ENSMUSG00000024940	rodent conserved	rat	1.19014	1.7128	0.305147
ENSMUSG00000024579	rodent conserved	rat	0.632791	0.104683	-5.04485
ENSMUSG00000056966	rodent conserved	rat	0.0827751	4.92507	0.983193
ENSMUSG00000026922	rodent conserved	rat	353.35	77.1318	-3.58113
ENSMUSG00000028647	rodent conserved	rat	54.3059	20.9065	-1.59756
ENSMUSG00000045991	rodent conserved	rat	10.3668	33.4128	0.689737
ENSMUSG00000027531	rodent conserved	rat	67.6935	21.2735	-2.18205
ENSMUSG00000034022	rodent conserved	rat	36.9074	27.2938	-0.352228
ENSMUSG00000034707	rodent conserved	rat	91.0169	139.988	0.349825
ENSMUSG00000029828	rodent conserved	rat	0.615033	5.78354	0.893658
ENSMUSG00000051346	rodent conserved	rat	27.8872	23.4951	-0.186939
ENSMUSG00000019984	rodent conserved	rat	5.40946	15.0883	0.64148
ENSMUSG00000037541	rodent conserved	rat	5.20859	6.21747	0.162267
ENSMUSG00000032077	rodent conserved	rat	5.28968	4.93742	-0.0713453
ENSMUSG00000024384	rodent conserved	rat	12.1639	12.0526	-0.00923219
ENSMUSG00000062929	rodent conserved	rat	32.1461	51.3634	0.374143
ENSMUSG00000070643	rodent conserved	rat	5.01918	7.7943	0.356045
ENSMUSG00000020921	rodent conserved	rat	5.76115	10.7023	0.46169
ENSMUSG00000026578	rodent conserved	rat	1.85097	1.91616	0.0340185
ENSMUSG00000044534	rodent conserved	rat	2.55635	4.18979	0.389861
ENSMUSG00000028128	rodent conserved	rat	3.58162	1.93663	-0.84941
ENSMUSG00000001604	rodent conserved	rat	62.3655	19.2768	-2.23526
ENSMUSG00000025613	rodent conserved	rat	164.139	68.6586	-1.39066
ENSMUSG00000025545	rodent conserved	rat	55.5707	33.0954	-0.679105
ENSMUSG00000002984	rodent conserved	rat	35.9734	40.9866	0.122313
ENSMUSG00000071633	rodent conserved	rat	110.128	128.745	0.144603
ENSMUSG00000071256	rodent conserved	rat	5.40527	5.62033	0.0382648
ENSMUSG00000050931	lineage specific	mouse	12.2338	15.2067	-0.243008
ENSMUSG00000029189	lineage specific	mouse	9.20825	7.85325	0.14715
ENSMUSG00000046404	lineage specific	mouse	6.14751	9.17815	-0.492987
ENSMUSG00000038894	lineage specific	mouse	10.3094	11.5857	-0.123801
ENSMUSG00000025348	lineage specific	mouse	4.14118	9.57219	-1.31146
ENSMUSG00000055128	lineage specific	mouse	22.8045	52.1819	-1.28822
ENSMUSG00000033863	lineage specific	mouse	59.7626	42.7232	0.285118
ENSMUSG00000043085	lineage specific	mouse	14.7495	18.0474	-0.223595
ENSMUSG00000032246	lineage specific	mouse	2.43672	5.06858	-1.08008
ENSMUSG00000039568	lineage specific	mouse	6.86239	7.95842	-0.159717
ENSMUSG00000034330	lineage specific	mouse	3.92258	1.16038	0.704179
ENSMUSG00000031592	lineage specific	mouse	6.13734	10.3548	-0.687183
ENSMUSG00000003378	lineage specific	mouse	1.77337	0.482482	0.72793
ENSMUSG00000026627	lineage specific	mouse	1.32742	1.44483	-0.0884464
ENSMUSG00000029404	lineage specific	mouse	25.0175	24.6035	0.0165481
ENSMUSG00000027079	lineage specific	mouse	11.6089	6.24871	0.461733
ENSMUSG00000037705	lineage specific	mouse	0.440806	0.0268797	0.939022
ENSMUSG00000027803	lineage specific	mouse	6.57422	13.4884	-1.05171
ENSMUSG00000033837	lineage specific	mouse	0.1691	2.23657	-12.2264
ENSMUSG00000030470	lineage specific	mouse	45.0858	0.240632	0.994663
ENSMUSG00000023087	lineage specific	rat	7.43515	8.49177	0.124429
ENSMUSG00000000567	lineage specific	rat	1.36192	0.367871	-2.70216
ENSMUSG00000022877	lineage specific	rat	627.763	4043.35	0.844742
ENSMUSG00000000385	lineage specific	rat	2.44683	0.977037	-1.50434
ENSMUSG00000049115	lineage specific	rat	32.7001	64.1225	0.490037
ENSMUSG00000028001	lineage specific	rat	5469.47	267.903	-19.4159
ENSMUSG00000071671	lineage specific	rat	278.515	63.014	-3.41989
ENSMUSG00000040260	lineage specific	rat	2.1145	0.881056	-1.39997
ENSMUSG00000005813	lineage specific	rat	48.7506	33.772	-0.443522
ENSMUSG00000028518	lineage specific	rat	14.2167	62.4278	0.772269
ENSMUSG00000049411	lineage specific	rat	4.55145	2.7556	-0.651708
ENSMUSG00000036499	lineage specific	rat	9.56619	7.20916	-0.326949
ENSMUSG00000024811	lineage specific	rat	28.6176	31.798	0.10002
ENSMUSG00000072582	lineage specific	rat	11.3417	5.46075	-1.07695
ENSMUSG00000049134	lineage specific	rat	0.0409729	0.169465	0.758222
ENSMUSG00000039620	lineage specific	rat	8.24992	0.242564	-33.0113
ENSMUSG00000041460	lineage specific	rat	0.285427	3.03993	0.906108
ENSMUSG00000033356	lineage specific	rat	1.65426	2.44344	0.322978
ENSMUSG00000048578	lineage specific	rat	97.5029	34.3337	-1.83986
ENSMUSG00000044452	lineage specific	rat	8.8546	8.65185	-0.0234336
ENSMUSG00000060703	lineage specific	rat	248.603	643.046	0.613397
ENSMUSG00000034110	lineage specific	rat	5.98119	5.18182	-0.154264
ENSMUSG00000040033	lineage specific	rat	22.1146	63.5968	0.652269
ENSMUSG00000025016	lineage specific	rat	158.601	219.592	0.277745
ENSMUSG00000034993	lineage specific	rat	18.8428	101.977	0.815226
ENSMUSG00000024805	lineage specific	rat	7.75634	6.87333	-0.128469
ENSMUSG00000035863	lineage specific	rat	1.31507	1.96737	0.331559
ENSMUSG00000033184	lineage specific	rat	93.3797	52.3606	-0.783398
ENSMUSG00000022175	lineage specific	rat	32.0748	25.3924	-0.263166
ENSMUSG00000044066	lineage specific	rat	6.86836	4.8939	-0.403452
ENSMUSG00000031633	lineage specific	rat	16.0353	11.2414	-0.426445
ENSMUSG00000041773	lineage specific	rat	2.5647	7.09405	0.638472
ENSMUSG00000034751	lineage specific	rat	0.774992	4.23277	0.816907
ENSMUSG00000026608	lineage specific	rat	5.45699	6.06852	0.100771
ENSMUSG00000022440	lineage specific	rat	3.34612	0.261571	-11.7924
ENSMUSG00000005034	lineage specific	rat	34.2407	26.6049	-0.287003
ENSMUSG00000007207	lineage specific	rat	0.25039	0.094514	-1.64924
ENSMUSG00000055334	lineage specific	rat	6.50942	9.51897	0.316163
ENSMUSG00000039828	lineage specific	rat	2.25875	60.3151	0.962551
ENSMUSG00000024446	lineage specific	rat	12.548	380.216	0.966998
ENSMUSG00000059714	lineage specific	rat	22.9288	34.288	0.331288
ENSMUSG00000036678	lineage specific	rat	11.3632	8.93007	-0.272464
ENSMUSG00000010476	lineage specific	rat	0.0456478	0.0831754	0.451187
ENSMUSG00000001672	lineage specific	rat	1.42174	3.59077	0.604056
ENSMUSG00000031101	lineage specific	rat	1.1962	0.865769	-0.381667
ENSMUSG00000018476	lineage specific	rat	4.23741	9.19677	0.53925
ENSMUSG00000032549	lineage specific	rat	0.45488	0.0439758	-9.34385
ENSMUSG00000039756	lineage specific	rat	10.7081	14.4863	0.26081
ENSMUSG00000042271	lineage specific	rat	57.1148	9.26781	-5.16271
ENSMUSG00000023968	lineage specific	rat	0.347239	0.364212	0.0466022
ENSMUSG00000021427	lineage specific	rat	58.8888	94.396	0.376152
ENSMUSG00000035878	lineage specific	rat	53.0543	47.2958	-0.121756
ENSMUSG00000031627	lineage specific	rat	23.0551	22.1132	-0.0425972
ENSMUSG00000031902	lineage specific	rat	9.5955	11.1612	0.140283
ENSMUSG00000043398	lineage specific	rat	0.642923	0.146586	-3.38597
ENSMUSG00000038375	lineage specific	rat	43.2451	46.8745	0.0774282
ENSMUSG00000021539	lineage specific	rat	201.56	136.978	-0.471476
ENSMUSG00000054302	lineage specific	rat	22.7674	56.2869	0.595511
ENSMUSG00000020300	lineage specific	rat	18.1151	38.412	0.528399
ENSMUSG00000022332	lineage specific	rat	14.7463	2.65595	-4.5522
ENSMUSG00000022346	lineage specific	rat	14.314	8.49949	-0.684097
ENSMUSG00000034837	lineage specific	rat	12.2416	3.34289	-2.66197
ENSMUSG00000039968	lineage specific	rat	2.18854	7.57437	0.711059
ENSMUSG00000024131	lineage specific	rat	49.9667	1.50174	-32.2726
ENSMUSG00000028111	lineage specific	rat	0.146061	2.987	0.951101
